# Supplementary material
Source: PubMed Central journal article supplement (PMC3398762)
Supplement: supp_blood-2012-02-408492_blood-2012-02-408492-1.pdf [file supp_blood-2012-02-408492_blood-2012-02-408492-1.pdf]

## Supplemental Material

### Treatment protocols

Patients were treated on one of the following intensive cytarabine/daunorubicin-based Cancer and Leukemia Group B (CALGB) frontline treatment protocols: 8525 (n=18),<sup>1</sup> 8923 (n=10),<sup>2</sup> 9420 (n=5),<sup>3</sup> 9720 (n=89),<sup>4,5</sup> or 10201 (n=57).<sup>6</sup> The analyzed patient subset (n=179) performed similarly to comparable *de novo* CN-AML patients which have not been included in our dataset [n=151; complete remission (CR):  $P=.31$ , disease-free survival (DFS):  $P=.40$ , overall survival (OS):  $P=.99$ ].

Among these protocols, CALGB 9420, 9720, and 10201 included investigational agents other than chemotherapy. CALGB 9720<sup>4,5</sup> was initiated as a phase III trial in untreated acute myeloid leukemia (AML) patients 60 years and older evaluating multidrug resistance (MDR) modulation by valspodar (PSC-833) during induction and consolidation therapy with cytarabine, daunorubicin, and etoposide. The valspodar (PSC-833) arm was closed after randomized assignment of 120 patients because of excessive early deaths. Enrollment on this protocol continued on the chemotherapy-only control arm. CALGB 10201<sup>6</sup> evaluated the *BCL2* antisense, oblimersen sodium (Genasense; G3139) administered with induction and consolidation chemotherapy; preliminary results showed no impact of the antisense on outcome. CALGB 9420<sup>3</sup> and CALGB 9720<sup>4,5</sup> evaluated a subcutaneous IL-2 regimen in older AML patients as maintenance therapy, which was demonstrated to induce no clear benefit. Per the

protocols, patients enrolled on these studies did not receive stem cell transplantation in first CR.

### **Sample preparation and *miR-3151* and *BAALC* expression analyses**

Patients enrolled on the aforementioned treatment protocols were also enrolled on the companion protocols CALGB 9665 (Leukemia Tissue Bank) and CALGB 20202 (molecular studies in AML), and gave informed consent for pretreatment marrow and blood collection and their research use in accordance with the Declaration of Helsinki. Mononuclear cells from pretreatment blood were enriched by Ficoll-Hypaque gradient and cryopreserved in liquid nitrogen until they were thawed at 37°C for analysis. DNA and total RNA sample extraction and quality control were performed as reported previously.<sup>7-10</sup> Briefly, total RNA was extracted using the Trizol method and complementary DNA was synthesized from total RNA using the MicroRNA Reverse Transcription Kit (Invitrogen, Carlsbad, CA) and SuperScript®III (Invitrogen, Carlsbad, CA) respectively according to protocol instructions. Custom made RT-PCR primers for *miR-3151* were obtained from ABI (Life Technologies Corporation/Applied Biosystems, Carlsbad, CA). The TaqMan assays were carried out for each sample in triplicate using Taqman Primer-Probe sets for *BAALC* and *miR-3151* and the respective house-keeping genes *18S* and *RNU44* (Life Technologies Corporation/Applied Biosystems, Carlsbad, CA) according to protocol instructions. To determine the relative levels of expression of *miR-3151* and *BAALC*, the comparative  $C_T$  method was used (Life Technologies Corporation/Applied Biosystems, Carlsbad, CA ). First, the parameter threshold cycle ( $C_T$ ) was determined for *miR-3151* and *RNU44* as well as for *BAALC* and *18S*, and the

cycle number difference ( $RNU44 - miR-3151$  and  $18S - BAALC = \Delta C_T$ ) was calculated for each replicate. If  $miR-3151$  or  $BAALC$  failed to reach the threshold, the sample was considered below the detection limit. If  $RNU44$  or  $18S$  amplification failed, the sample was omitted from the analysis. Finally, the mean  $\Delta C_T$  from the three replicates was generated [ $(\sum \Delta C_T)/3 = MC_T$ ], normalizing  $miR-3151$  expression to  $RNU44$  expression and  $BAALC$  expression to  $18S$  expression. Negative controls were included in each assay.

### **Gene- expression profiling (GEP)**

For GEP, total RNA was extracted from pretreatment bone marrow (BM) or blood mononuclear cells of 156 patients with material available. Gene-expression of samples from patients enrolled on CALGB 9720 and 10201 was profiled using the Affymetrix U133 plus 2.0 array (Affymetrix, Santa Clara, CA) as previously reported.<sup>11</sup> For expression profiling, summary measures of gene-expression were computed simultaneously for all samples using the robust multichip average (RMA) method, which incorporates quantile normalization of arrays.<sup>12</sup> Expression values were logged (base 2) before analysis. A filtering step was performed to remove probe-sets that did not display significant variation in expression across arrays. In this procedure, a chi-square test was used to test whether the observed variance in expression of a probe set was significantly larger than the median observed variance in expression for all probe-sets using  $\alpha=.01$  as the significance level; 24,649 probe-sets passed the filtering criterion and were included in subsequent analyses. An expression signature was derived by comparing gene expression between low and high  $miR-3151$  expressers. A univariable

significance level of .001 was used to determine the probe-sets that comprised the signature. A global test of significance based on a permutation procedure was performed to determine whether or not the number of differentially expressed probe sets was more than expected by chance; if not, no signature is reported for the comparison.

### **MicroRNA expression profiling (MEP)**

For MEP total RNA was extracted from pretreatment BM or blood mononuclear cells of 135 patients with material available. MicroRNA expression was profiled using The Ohio State University custom microRNA array (OSU\_CCC version 4.0) as previously reported.<sup>11</sup> For expression profiling, signal intensities were calculated for each spot, with an adjustment made for local background. Spots that were flagged due to low signal-to-noise ratio on more than 75% of arrays were excluded from analysis. Signal intensities were log-transformed and quantile normalization was performed on arrays using spots for all human and mouse microRNA probes represented on the array. Log-signal intensities from replicate spots (ie, spots representing the same probe) were averaged. For each microRNA probe, an adjustment was made for batch effects (ie, differences in expression related to the batch in which arrays were hybridized). Further analysis was limited to 460 unique human probes that passed the filtering criterion. An expression signature was derived by comparing microRNA expression between low and high *miR-3151* expressers. A univariable significance level of <.005 was used to determine the probes that comprised the signature. A global test of significance based on a permutation procedure was performed to determine whether or

not the number of differentially expressed probes was more than expected by chance; if not, no signature is reported for the comparison.

### **Stable expression of *miR-3151***

The stemloop of *miR-3151* with 200bp flanking sequence was cloned into the HIV based lentiviral dual promoter vector (pCDH-CMV-MCS-EF1-copGFP+Puro cDNA; System Biosciences, Mountain View, CA). As a control, lentiviral scramble control miR was used according to the manufacturer's instructions (miRZIP000, System Biosciences). 4500µg lentiviral construct was transfected into 293TN cells using 45µg pPACKH1 and 55µl PureFection (System Biosciences). After 48h and 72h, the supernatant containing the pseudoviral particles was collected and the virus was precipitated overnight at 4°C using 7.5ml PEG-IT virus precipitation solution (System Biosciences). 200µl Phosphate Buffered Saline and 25µM Hepes Buffer were used for resuspension of the pelleted virus. 200,000 KG1 cells/ml were infected in triplicate with 20 IU virus, using 5µl Transdux Infection Reagent (System Biosciences). Ten days later successfully infected cells were selected using Puromycin. To check for successful overexpression of *miR-3151*, RNA (1 million cells) was harvested on day 14 and reverse transcribed to cDNA using the TaqMan MicroRNA Reverse Transcription Kit (Life Technologies Corporation/Applied Biosystems, Carlsbad, CA). To analyze the effect of forced *miR-3151* expression on the predicted target genes, we used the Superscript III First-Strand cDNA Synthesis Kit (Life Technologies Corporation/Invitrogen). Both kits were used according to the manufacturer's

instructions. Simultaneously, protein (from 4 million cells) was harvested and used for Western Blotting.

### **Western blot analysis**

Western blotting was performed using the protein lysates, mixed with (6X) sodium dodecyl sulfate (SDS) loading buffer (125mM Tris pH 6.8, 4% SDS, 20% glycerol, 200 mM beta-mercaptoethanol, 0.2% [w/v] bromophenol blue) and boiled for 10 minutes. Protein samples were loaded onto a 4-20% Criterion Tris-HCl precast gel (Bio-Rad, Hercules, CA) and transferred to 0.45µm polyvinylidene fluoride (PVDF) membrane. Membranes were blocked using 5% milk and incubated in primary antibody overnight at 4° C on a rocking platform. Membranes were washed in Tris-Buffered Saline (TBS) buffer containing 0.1% Tween-20 and probed with secondary antibody for 2h. Following a final wash in TBS buffer containing Tween-20, membranes were incubated in ECL Western blotting detection reagents (GE Healthcare, Piscataway, NJ) and exposed to film (Denville Scientific, Metuchen, NJ). Antibodies used were: Actin (sc-1616, 1:1000), FBL20 (sc-242799, 1:200; Santa Cruz Biotechnologies, Santa Cruz, CA) and anti-goat HRP-linked.

### **Luciferase reporter assays**

To assess the inhibiting potential of *miR-3151* on *FBXL20* and *USP40* gene expression, 500bp of the respective 3'-untranslated regions (UTR) containing the predicted *miR-3151* binding sites were cloned into a luciferase reporter vector (pGL4.24; Promega Corporation, Madison, WI). Mutation of the predicted binding sites was accomplished

using bi-directional mutation primers, exchanging 3 nucleotides of the respective predicted binding sequences. Primer sequences and the corresponding annealing temperatures are listed in Supplemental Table 3. HEK 293T cells (American Type Culture Collection ATCC, Manassas, VA) were cultured in DMEM culture medium supplemented with 10% Fetal Bovine Serum, L-glutamine (200mM), and antibiotic/antimycotic agent (all Life Technologies Corporation/Gibco, Carlsbad, CA) and grown at 37°C with 5% CO<sub>2</sub>. When the culture reached 80% confluency, the cells were transfected in triplicate with reporter and control constructs (Renilla, pGL4.74; Promega Corporation,) using Lipofectamin 2000 transfection reagent (Life Technologies Corporation/Invitrogen). Cells were co-transfected with 10pmol of either MIR-3151 (Pre-miR miRNA Precursor, Life Technologies Corporation/Ambion) or scramble control-miR (negative Control Pre-miR #1, Ambion). Transfected cells were incubated for 24h at 37°C with 5% CO<sub>2</sub> in Opti-MEM II medium containing the Lipofectamine/plasmid combination. Protein lysates were assessed for firefly luciferase and *Renilla* luciferase activities according to the recommendations detailed in the Dual-Luciferase Reporter Assay System (Promega Corporation). For further analysis, relative expression was normalized using co-transfected *Renilla* luciferase.

### **Statistical analyses**

Patients were divided into quartile groups – based on expression levels of *miR-3151* and assessed for outcome associations by the trend test for DFS ( $P=.03$ ) and OS ( $P=.001$ ); based on these results a median cut was used in all statistical analyses.<sup>13</sup> A median cut for *BAALC* was used in all statistical analyses, as previously published.<sup>14</sup>

For analysis of the *ERG* expression data, complete case analysis was used to handle missing expression data of the patients.

### **Definition of clinical endpoints**

CR was defined as recovery of morphologically normal BM and blood counts (ie, neutrophils  $\geq 1,500/\mu\text{l}$  and platelets  $>100,000/\mu\text{l}$ ), and no circulating leukemic blasts or evidence of extramedullary leukemia. DFS was measured from the date of CR until date of relapse or death, regardless of cause. OS was measured from the date on study until date of death. Patients alive at last follow-up were censored for both DFS and OS.

### **Multivariable models**

Variables in addition to *miR-3151* and *BAALC* expression that were considered for univariable analyses for CR were age, sex, race, hemoglobin, platelet count, white blood count (WBC), *NPM1* (mutated vs wild-type), *FLT3*-ITD (present vs absent), *FLT3*-TKD (present vs absent), *CEBPA* (mutated vs wild-type), ELN Genetic Group (Favorable vs Intermediate-I), *TET2* (mutated vs wild-type), *ASXL1* (mutated vs wild-type), *DNMT3A* (mutated vs wild-type), *RUNX1* (mutated vs wild-type), *MLL*-PTD (present vs absent), *IDH1* (mutated vs wild-type), *IDH2* (mutated vs wild-type), *WT1* (mutated vs wild-type) and *ERG* expression (high vs low). Variables considered for inclusion in the logistic models were those significant at  $\alpha=.20$  from the univariable models. Variables remaining in the final models were significant at  $\alpha=.05$ .



Variables in addition to *miR-3151* expression that were considered for univariable analyses for DFS and OS were age, sex, race, hemoglobin, platelet count, WBC, *NPM1* (mutated vs wild-type), *FLT3-ITD* (present vs absent), *FLT3-TKD* (present vs absent), *CEBPA* (mutated vs wild-type), ELN Genetic Group (Favorable vs Intermediate-I), *TET2* (mutated vs wild-type), *ASXL1* (mutated vs wild-type), *DNMT3A* (mutated vs wild-type), *RUNX1* (mutated vs wild-type), *MLL-PTD* (present vs absent), *IDH1* (mutated vs wild-type), *IDH2* (mutated vs wild-type), *WT1* (mutated vs wild-type) and *BAALC* and *ERG* expression (high vs low). Variables significant at  $\alpha=.20$  from the univariable analyses were considered for multivariable analyses. The proportional hazards assumption was checked for each variable individually. If the proportional hazards assumption was not met for a particular variable, then an artificial time dependent covariate was included in all models that contained that variable.<sup>14</sup>

## Supplemental Tables

**Supplemental Table 1.** Bivariable models for outcome according to the expression status of *miR-3151* and *BAALC* in older patients with cytogenetically normal acute myeloid leukemia

### A Complete Remission

| Variable                   | Categories               | P-value | Odds Ratio*<br>(95% CI) |
|----------------------------|--------------------------|---------|-------------------------|
| <i>miR-3151</i> expression | High vs Low (median cut) | <.001   | 0.47 (0.23, 0.96)       |
| <i>BAALC</i> expression    | High vs Low (median cut) | <.001   | 0.30 (0.14, 0.64)       |

### B Disease-Free Survival

| Variable                   | Categories               | P-value | Hazard Ratio†<br>(95% CI) |
|----------------------------|--------------------------|---------|---------------------------|
| <i>miR-3151</i> expression | High vs Low (median cut) | .01     | 1.68 (1.13, 2.48)         |
| <i>BAALC</i> expression    | High vs Low (median cut) | .003    | 1.82 (1.24, 2.69)         |

### C Overall Survival

| Variable                   | Categories               | P-value | Hazard Ratio†<br>(95% CI) |
|----------------------------|--------------------------|---------|---------------------------|
| <i>miR-3151</i> expression | High vs Low (median cut) | .002    | 1.68 (1.20, 2.36)         |
| <i>BAALC</i> expression    | High vs Low (median cut) | <.001   | 2.01 (1.45, 2.81)         |

\*An odds ratio >1 (<1) corresponds to a higher (lower) odds of achieving a CR for the first level listed of a dichotomous variable.

†A hazard ratio >1 (<1) corresponds to a higher (lower) risk for the first level listed of a dichotomous variable.

**Supplemental Table 2.** Outcome analysis according to *miR-3151* expression status and ELN genetic group in older patients with cytogenetically normal acute myeloid leukemia

| Outcome                                 | Favorable                      |                                 |          | Intermediate-I                 |                                 |          |
|-----------------------------------------|--------------------------------|---------------------------------|----------|--------------------------------|---------------------------------|----------|
|                                         | Low<br><i>miR-3151</i><br>n=50 | High<br><i>miR-3151</i><br>n=35 | <i>P</i> | Low<br><i>miR-3151</i><br>n=40 | High<br><i>miR-3151</i><br>n=52 | <i>P</i> |
| <b>Complete remission rate, no. (%)</b> | 42 (84)                        | 26 (74)                         | .29      | 31 (78)                        | 27 (52)                         | .02      |
| <b>Disease-free Survival</b>            |                                |                                 | .55      |                                |                                 | <.001    |
| Median, y                               | 1.1                            | 1.0                             |          | 1.1                            | 0.6                             |          |
| Disease-free at 3 y, % (95% CI)         | 29 (16-43)                     | 15 (5-31)                       |          | 23 (10-38)                     | 0                               |          |
| <b>Overall Survival</b>                 |                                |                                 | .18      |                                |                                 | <.001    |
| Median, y                               | 1.5                            | 1.4                             |          | 1.0                            | 0.7                             |          |
| Alive at 3 y, % (95% CI)                | 36 (23-49)                     | 20 (9-34)                       |          | 28 (15-42)                     | 4 (1-12)                        |          |

Abbreviations: y, years; CI, confidence interval.

\* The ELN Favorable Genetic Group comprises patients with mutated *CEBPA* and those with mutated *NPM1* without *FLT3*-ITD; the ELN Intermediate-I Genetic Group includes patients with *CEBPA* wild-type who are either *FLT3*-ITD-positive and *NPM1*-mutated, *FLT3*-ITD-negative and *NPM1* wild-type or *FLT3*-ITD-positive and *NPM1* wild-type.

**Supplemental Table 3.** Primer sequences and corresponding annealing temperatures for cloning and mutational sequence changes of the *FBXL20* and *USP40* 3'-UTRs.

| <b>Amplicon</b>                        | <b>Primer Sequence (5'-3')</b>                                  | <b>Annealing Temperature</b> |
|----------------------------------------|-----------------------------------------------------------------|------------------------------|
| FBXL20 cloning F<br>FBXL20 cloning R   | cgtcgaattcGTTGCCTTGAAATCACTGTG<br>cgtcgaattcATGCAAACGTAAACACGAC | 58 °C                        |
| FBXL20 mutation F<br>FBXL20 mutation R | CTGTTGCTCCCCTTTACACTCTTG<br>CAAGAGTGTAAGGGGAGCAACAG             | 52 °C<br>52 °C               |
| USP40 cloning F<br>USP40 cloning R     | cgtcgaattcGGCTTCTCACAGTGTCTCAG<br>cgtcgaattcCTCGTGGAAGAGCTCGCAC | 58 °C                        |
| USP40 mutation F<br>USP40 mutation R   | GACTTCATGGCCTTTACTCGTTC<br>GAACGAGTAAAGGCCATGAAGTC              | 52 °C<br>52 °C               |

**Supplemental Table 4. *miR-3151*-associated gene expression signature in CN-AML patients: Upregulated genes.** High *miR-3151* expresser status was associated with the upregulation of 192 probe sets (116 annotated genes) out of 24,649 investigated (Global test *P*-value = .001).

| Probe set   | Gene Symbol     | Fold-change: <i>miR-3151</i><br>High/Low | <i>P</i> -value |
|-------------|-----------------|------------------------------------------|-----------------|
| 202912_at   | <i>ADM</i>      | 2.91                                     | 1.00E-07        |
| 1566363_at  | <i>DNTT</i>     | 2.60                                     | 0.000311        |
| 218899_s_at | <i>BAALC</i>    | 2.55                                     | 1.20E-06        |
| 210487_at   | <i>DNTT</i>     | 2.49                                     | 0.0003485       |
| 222780_s_at | <i>BAALC</i>    | 2.44                                     | 1.00E-06        |
| 1562433_at  | <i>FLJ10489</i> | 2.08                                     | 4.10E-06        |
| 201540_at   | <i>FHL1</i>     | 2.02                                     | 3.70E-06        |
| 205330_at   | <i>MN1</i>      | 2.00                                     | 0.0001118       |
| 229390_at   | <i>FAM26F</i>   | 1.99                                     | 3.66E-05        |
| 230896_at   | <i>BEND4</i>    | 1.91                                     | 0.0002137       |
| 204057_at   | <i>IRF8</i>     | 1.91                                     | 0.0003184       |
| 243819_at   |                 | 1.88                                     | 7.27E-05        |
| 215078_at   | <i>SOD2</i>     | 1.88                                     | 0.0001314       |
| 205984_at   | <i>CRHBP</i>    | 1.87                                     | 4.71E-05        |
| 209823_x_at | <i>HLA-DQB1</i> | 1.87                                     | 0.000231        |
| 202283_at   | <i>SERPINF1</i> | 1.84                                     | 9.10E-05        |
| 210299_s_at | <i>FHL1</i>     | 1.81                                     | 1.23E-05        |
| 228376_at   | <i>GGTA1</i>    | 1.80                                     | 9.50E-06        |
| 219648_at   | <i>MREG</i>     | 1.80                                     | 9.13E-05        |
| 229391_s_at | <i>FAM26F</i>   | 1.77                                     | 2.80E-05        |
| 223467_at   | <i>RASD1</i>    | 1.77                                     | 2.42E-05        |
| 213931_at   |                 | 1.76                                     | 4.39E-05        |
| 242814_at   | <i>SERPINB9</i> | 1.76                                     | 1.12E-05        |
| 224435_at   | <i>C10orf58</i> | 1.74                                     | 0.0001958       |
| 214505_s_at | <i>FHL1</i>     | 1.74                                     | 1.42E-05        |
| 209723_at   | <i>SERPINB9</i> | 1.74                                     | 0.0006185       |
| 1559425_at  |                 | 1.73                                     | 9.90E-06        |
| 233223_at   |                 | 1.73                                     | 1.01E-05        |
| 211656_x_at |                 | 1.72                                     | 0.0005121       |
| 215990_s_at | <i>BCL6</i>     | 1.70                                     | 0.0006403       |
| 1564796_at  | <i>EMP1</i>     | 1.70                                     | 0.0002895       |
| 242064_at   | <i>SDK2</i>     | 1.70                                     | 1.21E-05        |
| 202388_at   | <i>RGS2</i>     | 1.68                                     | 0.0001906       |

|              |                  |      |           |
|--------------|------------------|------|-----------|
| 1552542_s_at | <i>TAGAP</i>     | 1.67 | 4.16E-05  |
| 213506_at    | <i>F2RL1</i>     | 1.66 | 0.0009492 |
| 210298_x_at  | <i>FHL1</i>      | 1.65 | 0.0001137 |
| 211302_s_at  | <i>PDE4B</i>     | 1.65 | 0.0007491 |
| 239979_at    |                  | 1.63 | 0.0001418 |
| 204794_at    | <i>DUSP2</i>     | 1.62 | 9.77E-05  |
| 201539_s_at  | <i>FHL1</i>      | 1.62 | 5.28E-05  |
| 209305_s_at  | <i>GADD45B</i>   | 1.62 | 0.0002034 |
| 200832_s_at  | <i>SCD</i>       | 1.61 | 7.70E-06  |
| 224823_at    | <i>MYLK</i>      | 1.60 | 0.0007962 |
| 215223_s_at  | <i>SOD2</i>      | 1.60 | 0.0005505 |
| 228758_at    | <i>BCL6</i>      | 1.59 | 0.0006702 |
| 207574_s_at  | <i>GADD45B</i>   | 1.59 | 0.000571  |
| 209304_x_at  | <i>GADD45B</i>   | 1.58 | 0.0003232 |
| 208937_s_at  | <i>ID1</i>       | 1.58 | 0.0004095 |
| 222315_at    |                  | 1.58 | 0.0001866 |
| 226878_at    | <i>HLA-DOA</i>   | 1.57 | 0.0006173 |
| 216016_at    | <i>NLRP3</i>     | 1.57 | 0.0004723 |
| 1556209_at   | <i>CLEC2B</i>    | 1.54 | 0.0008631 |
| 202481_at    | <i>DHRS3</i>     | 1.54 | 0.0005449 |
| 209457_at    | <i>DUSP5</i>     | 1.54 | 0.0002859 |
| 209582_s_at  | <i>CD200</i>     | 1.53 | 0.000115  |
| 229543_at    | <i>FAM26F</i>    | 1.53 | 0.0004945 |
| 202177_at    | <i>GAS6</i>      | 1.53 | 3.95E-05  |
| 201566_x_at  | <i>ID2</i>       | 1.53 | 0.000287  |
| 206682_at    | <i>CLEC10A</i>   | 1.52 | 0.0006437 |
| 203523_at    | <i>LSP1</i>      | 1.52 | 0.0005851 |
| 227108_at    | <i>STARD9</i>    | 1.52 | 0.000233  |
| 201565_s_at  | <i>ID2</i>       | 1.51 | 0.0007525 |
| 236898_at    |                  | 1.51 | 0.0008993 |
| 230212_at    | <i>SPRY1</i>     | 1.51 | 0.0002686 |
| 201531_at    | <i>ZFP36</i>     | 1.51 | 0.0009634 |
| 243465_at    |                  | 1.50 | 0.0002234 |
| 202340_x_at  | <i>NR4A1</i>     | 1.50 | 2.76E-05  |
| 219480_at    | <i>SNAI1</i>     | 1.49 | 1.00E-07  |
| 204918_s_at  | <i>MLLT3</i>     | 1.48 | 0.0003138 |
| 234050_at    | <i>TAGAP</i>     | 1.48 | 0.000557  |
| 235574_at    | <i>GBP4</i>      | 1.47 | 0.0001027 |
| 208436_s_at  | <i>IRF7</i>      | 1.46 | 0.0002375 |
| 209615_s_at  | <i>PAK1</i>      | 1.46 | 0.000625  |
| 229054_at    | <i>C14orf181</i> | 1.45 | 4.38E-05  |

|              |                    |      |           |
|--------------|--------------------|------|-----------|
| 214537_at    | <i>HIST1H1D</i>    | 1.45 | 0.0004494 |
| 223217_s_at  | <i>NFKBIZ</i>      | 1.44 | 0.0009275 |
| 227478_at    | <i>SETBP1</i>      | 1.43 | 0.0008673 |
| 214390_s_at  | <i>BCAT1</i>       | 1.42 | 0.0004886 |
| 228618_at    | <i>PEAR1</i>       | 1.42 | 0.0003346 |
| 235175_at    | <i>GBP4</i>        | 1.41 | 5.53E-05  |
| 1566232_at   |                    | 1.41 | 0.0001209 |
| 201841_s_at  | <i>HSPB1</i>       | 1.40 | 0.0004139 |
| 202555_s_at  | <i>MYLK</i>        | 1.40 | 0.0007748 |
| 241387_at    |                    | 1.40 | 0.0001764 |
| 215671_at    | <i>PDE4B</i>       | 1.40 | 0.0001311 |
| 212667_at    | <i>SPARC</i>       | 1.40 | 0.0003604 |
| 222773_s_at  | <i>GALNT12</i>     | 1.39 | 0.0006944 |
| 233867_at    |                    | 1.39 | 0.0001436 |
| 239901_at    |                    | 1.39 | 0.0004709 |
| 1558411_at   | <i>C3orf50</i>     | 1.38 | 0.0002312 |
| 221900_at    | <i>COL8A2</i>      | 1.38 | 0.0006902 |
| 209722_s_at  | <i>SERPINB9</i>    | 1.38 | 0.000104  |
| 225762_x_at  | <i>LOC284801</i>   | 1.37 | 0.000939  |
| 223129_x_at  | <i>MYLIP</i>       | 1.37 | 9.50E-06  |
| 225775_at    | <i>TSPAN33</i>     | 1.37 | 0.0007704 |
| 232239_at    | <i>hCG_2024094</i> | 1.36 | 0.0003539 |
| 220319_s_at  | <i>MYLIP</i>       | 1.36 | 4.56E-05  |
| 240671_at    |                    | 1.36 | 0.0006524 |
| 202014_at    | <i>PPP1R15A</i>    | 1.36 | 0.0003242 |
| 233138_at    | <i>C18orf1</i>     | 1.35 | 7.46E-05  |
| 235205_at    | <i>LOC346887</i>   | 1.35 | 0.0007481 |
| 244087_at    |                    | 1.35 | 0.0001114 |
| 221261_x_at  |                    | 1.35 | 0.0001938 |
| 244876_at    |                    | 1.35 | 0.0003286 |
| 223218_s_at  | <i>NFKBIZ</i>      | 1.35 | 0.0008108 |
| 227053_at    | <i>PACSIN1</i>     | 1.35 | 3.24E-05  |
| 227006_at    | <i>PPP1R14A</i>    | 1.35 | 1.07E-05  |
| 207821_s_at  | <i>PTK2</i>        | 1.35 | 0.0002505 |
| 238949_at    | <i>RNF145</i>      | 1.35 | 0.0001135 |
| 1552541_at   | <i>TAGAP</i>       | 1.35 | 3.61E-05  |
| 1598_g_at    | <i>GAS6</i>        | 1.34 | 7.70E-06  |
| 237571_at    |                    | 1.34 | 0.0009857 |
| 37028_at     | <i>PPP1R15A</i>    | 1.34 | 0.0003758 |
| 1555579_s_at | <i>PTPRM</i>       | 1.34 | 0.000501  |
| 242738_s_at  | <i>ZFH3</i>        | 1.34 | 0.0003126 |

|              |                     |      |           |
|--------------|---------------------|------|-----------|
| 223130_s_at  | <i>MYLIP</i>        | 1.33 | 9.40E-05  |
| 1565034_s_at |                     | 1.33 | 0.0001131 |
| 241577_at    |                     | 1.33 | 0.0002603 |
| 204121_at    | <i>GADD45G</i>      | 1.32 | 0.000359  |
| 206313_at    | <i>HLA-DOA</i>      | 1.31 | 0.0004997 |
| 231887_s_at  | <i>KIAA1274</i>     | 1.31 | 0.0007634 |
| 210313_at    | <i>LILRA4</i>       | 1.31 | 1.42E-05  |
| 242868_at    |                     | 1.31 | 0.000714  |
| 218611_at    | <i>IER5</i>         | 1.30 | 0.0008784 |
| 206429_at    | <i>F2RL1</i>        | 1.29 | 0.0003835 |
| 1567224_at   | <i>HMGA2</i>        | 1.29 | 0.0003882 |
| 232682_at    | <i>MREG</i>         | 1.29 | 0.0003514 |
| 229484_at    | <i>PPM1J</i>        | 1.29 | 1.18E-05  |
| 233379_at    | <i>PRR5L</i>        | 1.29 | 0.0006499 |
| 204713_s_at  | <i>F5</i>           | 1.28 | 0.0006393 |
| 204454_at    | <i>LDOC1</i>        | 1.28 | 0.0007596 |
| 228098_s_at  | <i>MYLIP</i>        | 1.28 | 0.0002199 |
| 1563357_at   |                     | 1.28 | 0.0002197 |
| 242551_at    |                     | 1.28 | 0.0007152 |
| 223839_s_at  | <i>SCD</i>          | 1.28 | 0.000563  |
| 202308_at    | <i>SREBF1</i>       | 1.28 | 0.00045   |
| 212654_at    | <i>TPM2</i>         | 1.28 | 1.80E-06  |
| 239272_at    | <i>MMP28</i>        | 1.27 | 0.0006608 |
| 223313_s_at  |                     | 1.27 | 0.0001821 |
| 223304_at    | <i>SLC37A3</i>      | 1.27 | 0.0001288 |
| 237315_at    |                     | 1.26 | 7.76E-05  |
| 236322_at    |                     | 1.26 | 0.000648  |
| 229062_at    | <i>ARL9</i>         | 1.25 | 0.0003144 |
| 223385_at    | <i>CYP2S1</i>       | 1.25 | 4.60E-06  |
| 228263_at    | <i>GRASP</i>        | 1.25 | 0.0004894 |
| 1570362_at   | <i>LOC100288009</i> | 1.25 | 4.73E-05  |
| 223932_at    |                     | 1.25 | 0.0002419 |
| 1557223_at   |                     | 1.25 | 0.0005938 |
| 211143_x_at  | <i>NR4A1</i>        | 1.25 | 9.70E-06  |
| 208779_x_at  | <i>DDR1</i>         | 1.24 | 2.70E-06  |
| 210749_x_at  | <i>DDR1</i>         | 1.24 | 3.88E-05  |
| 206896_s_at  | <i>GNG7</i>         | 1.24 | 0.0008744 |
| 241877_at    |                     | 1.24 | 1.67E-05  |
| 212528_at    |                     | 1.24 | 5.65E-05  |
| 203329_at    | <i>PTPRM</i>        | 1.24 | 0.0001066 |
| 211708_s_at  | <i>SCD</i>          | 1.24 | 4.76E-05  |



|              |                   |      |           |
|--------------|-------------------|------|-----------|
| 1552301_a_at | <i>CORO6</i>      | 1.23 | 0.0005449 |
| 1559529_at   | <i>PTK2</i>       | 1.23 | 0.000399  |
| 204811_s_at  | <i>CACNA2D2</i>   | 1.22 | 0.0005027 |
| 239317_at    | <i>CEACAM21</i>   | 1.22 | 0.0003081 |
| 239273_s_at  | <i>MMP28</i>      | 1.22 | 0.0001238 |
| 224771_at    | <i>NAV1</i>       | 1.22 | 0.0003001 |
| 224773_at    | <i>NAV1</i>       | 1.22 | 0.000377  |
| 227486_at    | <i>NT5E</i>       | 1.22 | 0.0003515 |
| 40148_at     | <i>APBB2</i>      | 1.21 | 0.0005349 |
| 214781_at    |                   | 1.21 | 0.0002272 |
| 216470_x_at  |                   | 1.21 | 0.0006018 |
| 236459_at    | <i>PRKCE</i>      | 1.21 | 0.0002985 |
| 1553493_a_at | <i>TDH</i>        | 1.21 | 0.0004184 |
| 205494_at    | <i>ZNF821</i>     | 1.21 | 0.0003261 |
| 212817_at    | <i>DNAJB5</i>     | 1.20 | 0.0001555 |
| 228403_at    | <i>ENHO</i>       | 1.20 | 0.0003024 |
| 244429_at    |                   | 1.20 | 0.0009389 |
| 227584_at    | <i>NAV1</i>       | 1.20 | 0.0009954 |
| 208711_s_at  | <i>CCND1</i>      | 1.19 | 0.0005108 |
| 207205_at    | <i>CEACAM4</i>    | 1.19 | 0.0003577 |
| 52651_at     | <i>COL8A2</i>     | 1.19 | 7.57E-05  |
| 205225_at    | <i>ESR1</i>       | 1.19 | 0.0007502 |
| 212707_s_at  |                   | 1.19 | 0.0002102 |
| 232290_at    |                   | 1.19 | 0.0004165 |
| 209325_s_at  | <i>RGS16</i>      | 1.19 | 0.0008462 |
| 209320_at    | <i>ADCY3</i>      | 1.18 | 0.00046   |
| 202986_at    | <i>ARNT2</i>      | 1.18 | 0.0004949 |
| 226985_at    | <i>FGD5</i>       | 1.18 | 0.0007412 |
| 203726_s_at  | <i>LAMA3</i>      | 1.18 | 5.14E-05  |
| 220006_at    | <i>CCDC48</i>     | 1.17 | 0.0006156 |
| 238986_at    | <i>FLJ43663</i>   | 1.17 | 0.0001125 |
| 226499_at    | <i>NRARP</i>      | 1.17 | 0.000448  |
| 203756_at    | <i>ARHGEF17</i>   | 1.16 | 0.000761  |
| 220448_at    | <i>KCNK12</i>     | 1.16 | 0.000976  |
| 1568795_at   |                   | 1.16 | 0.0008143 |
| 225909_at    | <i>tcag7.1196</i> | 1.16 | 0.0006626 |

**Supplemental Table 5. *miR-3151*-associated gene expression signature in CN-AML patients: Downregulated genes.** High *miR-3151* expresser status was associated with the downregulation of 405 probe sets (258 annotated genes) out of 24,649 investigated (Global test *P*-value = .001). Seventy-three of the downregulated genes are *in-silico* predicted targets of *miR-3151* (microrna.org). Highlighted in grey are the six probe-sets corresponding to annotated genes of the *in-silico* targets which showed  $\geq 25\%$  downregulation with a *P*-value  $< .0001$ .

| Probe set    | Gene Symbol        | Fold-change: <i>miR-3151</i><br>High/Low | <i>P</i> -value | <i>miR-3151 in-silico</i><br>predicted Target |
|--------------|--------------------|------------------------------------------|-----------------|-----------------------------------------------|
| 236892_s_at  | <i>hCG_2042068</i> | 0.44                                     | 0.0006833       | n.a. <sup>#</sup>                             |
| 1558871_at   |                    | 0.46                                     | 4.18E-05        |                                               |
| 219737_s_at  | <i>PCDH9</i>       | 0.48                                     | 0.0002818       | no                                            |
| 238784_at    | <i>DPY19L2</i>     | 0.49                                     | 0.0003588       | yes                                           |
| 204082_at    | <i>PBX3</i>        | 0.53                                     | 5.20E-06        | no                                            |
| 239791_at    | <i>hCG_2042068</i> | 0.54                                     | 0.0003422       | n.a.                                          |
| 242172_at    | <i>MEIS1</i>       | 0.55                                     | 0.000455        | yes                                           |
| 215767_at    | <i>ZNF804A</i>     | 0.55                                     | 1.70E-05        | no                                            |
| 242321_at    |                    | 0.55                                     | 0.0006427       |                                               |
| 205801_s_at  | <i>RASGRP3</i>     | 0.56                                     | 0.0007374       | no                                            |
| 240747_at    |                    | 0.57                                     | 5.46E-05        |                                               |
| 236193_at    | <i>HIST1H2BC</i>   | 0.58                                     | 0.00091         | no                                            |
| 230743_at    | <i>hCG_2042068</i> | 0.59                                     | 0.0001059       | n.a.                                          |
| 220416_at    | <i>ATP8B4</i>      | 0.60                                     | 0.0002586       | no                                            |
| 1559266_s_at | <i>C10orf140</i>   | 0.60                                     | 0.0004956       | no                                            |
| 240772_at    |                    | 0.60                                     | 5.11E-05        |                                               |
| 205942_s_at  | <i>ACSM3</i>       | 0.61                                     | 0.0007281       | no                                            |
| 210377_at    | <i>ACSM3</i>       | 0.63                                     | 0.0005425       | no                                            |
| 234145_at    | <i>PBX3</i>        | 0.64                                     | 2.22E-05        | no                                            |
| 212606_at    | <i>WDFY3</i>       | 0.64                                     | 0.0003402       | yes                                           |
| 241497_at    |                    | 0.66                                     | 0.0002142       |                                               |
| 238919_at    |                    | 0.66                                     | 0.0008977       |                                               |
| 226736_at    | <i>CHURC1</i>      | 0.67                                     | 0.0002505       | yes                                           |
| 227367_at    | <i>SLCO3A1</i>     | 0.67                                     | 3.70E-06        | yes                                           |
| 227031_at    | <i>SNX13</i>       | 0.67                                     | 3.64E-05        | no                                            |
| 243082_at    |                    | 0.67                                     | 0.0005293       |                                               |

|              |                 |      |           |     |
|--------------|-----------------|------|-----------|-----|
| 212651_at    | <i>RHOBTB1</i>  | 0.68 | 0.0003549 | no  |
| 239033_at    |                 | 0.68 | 0.0001358 |     |
| 1556818_at   |                 | 0.68 | 0.0009934 |     |
| 232412_at    | <i>FBXL20</i>   | 0.69 | 6.32E-05  | yes |
| 227224_at    | <i>RALGPS2</i>  | 0.69 | 2.38E-05  | no  |
| 1568964_x_at | <i>SPN</i>      | 0.69 | 0.0007393 | yes |
| 227533_at    |                 | 0.69 | 4.39E-05  |     |
| 1562280_at   |                 | 0.69 | 0.0004659 |     |
| 228108_at    |                 | 0.69 | 0.0007252 |     |
| 223513_at    | <i>CENPJ</i>    | 0.70 | 0.0008215 | no  |
| 230166_at    | <i>KIAA1958</i> | 0.70 | 4.90E-06  | yes |
| 227036_at    | <i>RASAL2</i>   | 0.70 | 0.0001915 | yes |
| 228696_at    | <i>SLC45A3</i>  | 0.70 | 0.000363  | yes |
| 203869_at    | <i>USP46</i>    | 0.70 | 0.0002599 | yes |
| 239482_x_at  | <i>ZNF708</i>   | 0.70 | 6.72E-05  | no  |
| 236002_at    |                 | 0.70 | 5.46E-05  |     |
| 233239_at    |                 | 0.70 | 0.0001189 |     |
| 1558605_at   |                 | 0.70 | 0.0002599 |     |
| 238043_at    |                 | 0.70 | 0.0007307 |     |
| 1563453_at   |                 | 0.70 | 0.000981  |     |
| 221522_at    | <i>ANKRD27</i>  | 0.71 | 7.84E-05  | no  |
| 225731_at    | <i>ANKRD50</i>  | 0.71 | 0.0004392 | yes |
| 224943_at    | <i>BTBD7</i>    | 0.71 | 7.40E-06  | no  |
| 203763_at    | <i>DYNC2LI1</i> | 0.71 | 0.0001115 | no  |
| 218618_s_at  | <i>FNDC3B</i>   | 0.71 | 0.0003876 | no  |
| 202660_at    | <i>ITPR2</i>    | 0.71 | 0.0004874 | yes |
| 235970_at    | <i>LCORL</i>    | 0.71 | 1.75E-05  | no  |
| 240592_at    | <i>LCORL</i>    | 0.71 | 7.61E-05  | no  |
| 239392_s_at  | <i>POGK</i>     | 0.71 | 9.44E-05  | yes |
| 232500_at    | <i>RALGAPA2</i> | 0.71 | 0.000644  | no  |
| 1553148_a_at | <i>SNX13</i>    | 0.71 | 6.23E-05  | no  |
| 243469_at    |                 | 0.71 | 0.0005396 |     |
| 232599_at    | <i>EXOC6</i>    | 0.72 | 0.0005936 | no  |
| 225032_at    | <i>FNDC3B</i>   | 0.72 | 2.90E-05  | no  |
| 213392_at    | <i>IQCK</i>     | 0.72 | 0.0005533 | yes |
| 224726_at    | <i>MIB1</i>     | 0.72 | 0.0004097 | no  |
| 239406_at    | <i>ZNF193</i>   | 0.72 | 0.0002445 | no  |
| 225176_at    |                 | 0.72 | 5.01E-05  |     |
| 63825_at     | <i>ABHD2</i>    | 0.73 | 0.0005065 | yes |
| 222266_at    | <i>C19orf2</i>  | 0.73 | 0.0004023 | no  |
| 1570571_at   | <i>CCDC91</i>   | 0.73 | 0.0005321 | no  |

|             |                  |      |           |     |
|-------------|------------------|------|-----------|-----|
| 222587_s_at | <i>GALNT7</i>    | 0.73 | 0.00075   | no  |
| 203955_at   | <i>KIAA0649</i>  | 0.73 | 3.31E-05  | yes |
| 209925_at   | <i>OCLN</i>      | 0.73 | 0.0004003 | no  |
| 222630_at   | <i>RFX7</i>      | 0.73 | 0.0001535 | yes |
| 204633_s_at | <i>RPS6KA5</i>   | 0.73 | 0.0001815 | no  |
| 226366_at   | <i>SHPRH</i>     | 0.73 | 0.0006594 | no  |
| 225085_at   | <i>USP40</i>     | 0.73 | 5.02E-05  | yes |
| 205928_at   | <i>ZNF443</i>    | 0.73 | 0.0002221 | no  |
| 204291_at   | <i>ZNF518A</i>   | 0.73 | 0.0006949 | no  |
| 243003_at   |                  | 0.73 | 0.0001094 |     |
| 233713_at   |                  | 0.73 | 0.000377  |     |
| 242343_x_at |                  | 0.73 | 0.0006754 |     |
| 241906_at   |                  | 0.73 | 0.0008831 |     |
| 244022_at   |                  | 0.73 | 0.0009613 |     |
| 213304_at   | <i>FAM179B</i>   | 0.74 | 0.0002543 | no  |
| 218313_s_at | <i>GALNT7</i>    | 0.74 | 0.0009507 | no  |
| 227931_at   | <i>INO80D</i>    | 0.74 | 0.0005216 | yes |
| 242458_at   | <i>RALGPS2</i>   | 0.74 | 6.30E-06  | no  |
| 217707_x_at | <i>SMARCA2</i>   | 0.74 | 0.0004349 | no  |
| 230759_at   | <i>SNX14</i>     | 0.74 | 3.23E-05  | no  |
| 223282_at   | <i>TSHZ1</i>     | 0.74 | 0.0006712 | yes |
| 205739_x_at | <i>ZNF107</i>    | 0.74 | 0.0008872 | no  |
| 215307_at   | <i>ZNF529</i>    | 0.74 | 0.0008217 | yes |
| 239731_at   |                  | 0.74 | 0.0001179 |     |
| 233228_at   |                  | 0.74 | 0.0004784 |     |
| 214820_at   | <i>BRWD1</i>     | 0.75 | 0.0003919 | no  |
| 225633_at   | <i>DPY19L3</i>   | 0.75 | 0.0006495 | no  |
| 235030_at   | <i>FAM55C</i>    | 0.75 | 0.0009935 | no  |
| 224016_at   | <i>HIPK2</i>     | 0.75 | 0.0009617 | yes |
| 214457_at   | <i>HOXA2</i>     | 0.75 | 0.0002601 | no  |
| 224725_at   | <i>MIB1</i>      | 0.75 | 0.0002309 | no  |
| 223464_at   | <i>OSBPL5</i>    | 0.75 | 7.85E-05  | yes |
| 238890_at   | <i>PSMG1</i>     | 0.75 | 0.0006195 | no  |
| 203883_s_at | <i>RAB11FIP2</i> | 0.75 | 4.17E-05  | no  |
| 202088_at   | <i>SLC39A6</i>   | 0.75 | 9.53E-05  | no  |
| 235890_at   | <i>TBL1XR1</i>   | 0.75 | 0.0004402 | no  |
| 1553118_at  | <i>THEM4</i>     | 0.75 | 0.0008293 | no  |
| 230029_x_at | <i>UBR3</i>      | 0.75 | 0.0001777 | no  |
| 226562_at   | <i>ZSCAN29</i>   | 0.75 | 6.40E-06  | no  |
| 237096_at   |                  | 0.75 | 0.0002812 |     |
| 240478_at   |                  | 0.75 | 0.0002859 |     |

|             |                     |      |           |     |
|-------------|---------------------|------|-----------|-----|
| 236385_at   |                     | 0.75 | 0.0004943 |     |
| 240625_at   |                     | 0.75 | 0.0008147 |     |
| 228694_at   |                     | 0.75 | 0.0009289 |     |
| 212289_at   | <i>ANKRD12</i>      | 0.76 | 0.0002169 | no  |
| 226901_at   | <i>C17orf58</i>     | 0.76 | 0.0006642 | no  |
| 223210_at   | <i>CHURC1</i>       | 0.76 | 8.47E-05  | yes |
| 1554154_at  | <i>GDAP2</i>        | 0.76 | 5.02E-05  | yes |
| 226191_at   | <i>GSK3B</i>        | 0.76 | 0.0001726 | yes |
| 212057_at   | <i>KIAA0182</i>     | 0.76 | 0.0003039 | yes |
| 227569_at   | <i>LNK2</i>         | 0.76 | 3.93E-05  | no  |
| 229664_at   | <i>MAPK8</i>        | 0.76 | 0.0003438 | no  |
| 232613_at   | <i>PBRM1</i>        | 0.76 | 1.57E-05  | no  |
| 212688_at   | <i>PIK3CB</i>       | 0.76 | 0.0004898 | no  |
| 219802_at   | <i>PYROXD1</i>      | 0.76 | 0.0006364 | no  |
| 220338_at   | <i>RALGPS2</i>      | 0.76 | 0.0001018 | no  |
| 227268_at   | <i>RNFT1</i>        | 0.76 | 0.0002366 | no  |
| 204635_at   | <i>RPS6KA5</i>      | 0.76 | 5.62E-05  | no  |
| 213694_at   | <i>RSBN1</i>        | 0.76 | 0.0009087 | yes |
| 212921_at   | <i>SMYD2</i>        | 0.76 | 0.0001919 | no  |
| 241731_x_at | <i>ZNF440</i>       | 0.76 | 1.51E-05  | no  |
| 222028_at   | <i>ZNF45</i>        | 0.76 | 0.0001961 | no  |
| 1556432_at  |                     | 0.76 | 8.57E-05  |     |
| 233393_at   |                     | 0.76 | 0.0001948 |     |
| 225318_at   |                     | 0.76 | 0.0006019 |     |
| 242920_at   |                     | 0.76 | 0.0006517 |     |
| 226030_at   | <i>ACADSB</i>       | 0.77 | 0.0001613 | yes |
| 212500_at   | <i>ADO</i>          | 0.77 | 6.58E-05  | yes |
| 221825_at   | <i>ANGEL2</i>       | 0.77 | 0.0008929 | no  |
| 212798_s_at | <i>ANKMY2</i>       | 0.77 | 0.0001912 | no  |
| 203525_s_at | <i>APC</i>          | 0.77 | 0.0003005 | no  |
| 224945_at   | <i>BTBD7</i>        | 0.77 | 0.0003606 | no  |
| 219972_s_at | <i>C14orf135</i>    | 0.77 | 0.0009821 | no  |
| 223983_s_at | <i>C19orf12</i>     | 0.77 | 4.56E-05  | yes |
| 228149_at   | <i>C7orf60</i>      | 0.77 | 0.0001894 | no  |
| 212981_s_at | <i>FAM115A</i>      | 0.77 | 0.000427  | no  |
| 202915_s_at | <i>FAM20B</i>       | 0.77 | 1.01E-05  | no  |
| 202271_at   | <i>FBXO28</i>       | 0.77 | 0.0002156 | yes |
| 223215_s_at | <i>JKAMP</i>        | 0.77 | 6.59E-05  | no  |
| 215698_at   | <i>KDM5A</i>        | 0.77 | 0.0001753 | yes |
| 232112_at   | <i>RALGPS2</i>      | 0.77 | 9.73E-05  | no  |
| 218499_at   | <i>RP6-213H19.1</i> | 0.77 | 0.0005841 | no  |

|              |                 |      |           |     |
|--------------|-----------------|------|-----------|-----|
| 222790_s_at  | <i>RSBN1</i>    | 0.77 | 0.0002179 | yes |
| 204156_at    | <i>SIK3</i>     | 0.77 | 5.02E-05  | yes |
| 236600_at    | <i>SPG20</i>    | 0.77 | 0.0005169 | no  |
| 218521_s_at  | <i>UBE2W</i>    | 0.77 | 0.0007051 | no  |
| 234982_at    | <i>UBR3</i>     | 0.77 | 6.58E-05  | no  |
| 220243_at    | <i>ZBTB44</i>   | 0.77 | 0.0005526 | yes |
| 229022_at    | <i>ZFX</i>      | 0.77 | 0.0003904 | no  |
| 204523_at    | <i>ZNF140</i>   | 0.77 | 0.0009089 | no  |
| 209989_at    | <i>ZNF268</i>   | 0.77 | 0.000987  | no  |
| 60794_f_at   | <i>ZNF814</i>   | 0.77 | 0.0007416 | no  |
| 218639_s_at  | <i>ZXDC</i>     | 0.77 | 4.19E-05  | yes |
| 239830_at    |                 | 0.77 | 5.16E-05  |     |
| 244456_at    |                 | 0.77 | 8.90E-05  |     |
| 1555325_s_at |                 | 0.77 | 0.0001902 |     |
| 237341_at    |                 | 0.77 | 0.0002003 |     |
| 1559723_s_at |                 | 0.77 | 0.0003648 |     |
| 1556306_at   |                 | 0.77 | 0.0008414 |     |
| 229692_at    |                 | 0.77 | 0.0008903 |     |
| 223297_at    | <i>AMMECR1L</i> | 0.78 | 0.0009393 | yes |
| 228594_at    | <i>C5orf33</i>  | 0.78 | 0.0001565 | yes |
| 204373_s_at  | <i>CEP350</i>   | 0.78 | 0.0005026 | no  |
| 203078_at    | <i>CUL2</i>     | 0.78 | 0.0001172 | no  |
| 228032_s_at  | <i>DENND1B</i>  | 0.78 | 0.0008005 | no  |
| 201025_at    | <i>EIF5B</i>    | 0.78 | 5.36E-05  | yes |
| 1563483_at   | <i>FAM91A2</i>  | 0.78 | 4.79E-05  | no  |
| 201724_s_at  | <i>GALNT1</i>   | 0.78 | 0.0002851 | no  |
| 201722_s_at  | <i>GALNT1</i>   | 0.78 | 0.0008337 | no  |
| 240602_at    | <i>HBS1L</i>    | 0.78 | 0.0009194 | no  |
| 203011_at    | <i>IMPA1</i>    | 0.78 | 0.0005389 | no  |
| 212056_at    | <i>KIAA0182</i> | 0.78 | 7.78E-05  | yes |
| 209255_at    | <i>KLHDC10</i>  | 0.78 | 0.000236  | no  |
| 227601_at    | <i>METTL14</i>  | 0.78 | 3.83E-05  | no  |
| 205408_at    | <i>MLLT10</i>   | 0.78 | 0.0001901 | yes |
| 212483_at    | <i>NIPBL</i>    | 0.78 | 0.0001484 | no  |
| 223238_s_at  | <i>PBRM1</i>    | 0.78 | 0.0002493 | no  |
| 219459_at    | <i>POLR3B</i>   | 0.78 | 0.0009418 | no  |
| 213049_at    | <i>RALGAPA1</i> | 0.78 | 0.0003032 | no  |
| 203775_at    | <i>SLC25A13</i> | 0.78 | 0.0002159 | no  |
| 225881_at    | <i>SLC35B4</i>  | 0.78 | 0.0007477 | yes |
| 202089_s_at  | <i>SLC39A6</i>  | 0.78 | 0.0003745 | no  |
| 204496_at    | <i>STRN3</i>    | 0.78 | 0.0008479 | no  |

|              |                |      |           |     |
|--------------|----------------|------|-----------|-----|
| 204067_at    | <i>SUOX</i>    | 0.78 | 0.0006076 | yes |
| 218882_s_at  | <i>WDR3</i>    | 0.78 | 0.0004948 | no  |
| 212402_at    | <i>ZC3H13</i>  | 0.78 | 0.0001191 | no  |
| 207304_at    | <i>ZNF45</i>   | 0.78 | 0.0006085 | no  |
| 222851_at    | <i>ZNF654</i>  | 0.78 | 0.0005023 | no  |
| 241348_at    | <i>ZNF654</i>  | 0.78 | 0.0006106 | no  |
| 229506_at    |                | 0.78 | 6.34E-05  |     |
| 240351_at    |                | 0.78 | 0.000228  |     |
| 242772_x_at  |                | 0.78 | 0.0005289 |     |
| 233976_at    |                | 0.78 | 0.000621  |     |
| 225935_at    |                | 0.78 | 0.0007008 |     |
| 1570264_at   |                | 0.78 | 0.0007658 |     |
| 203291_at    | <i>CNOT4</i>   | 0.79 | 0.0003755 | no  |
| 210320_s_at  | <i>DDX52</i>   | 0.79 | 4.48E-05  | no  |
| 212908_at    | <i>DNAJC16</i> | 0.79 | 0.0002277 | yes |
| 203693_s_at  | <i>E2F3</i>    | 0.79 | 0.00058   | no  |
| 226270_at    | <i>EXOC2</i>   | 0.79 | 0.0001111 | yes |
| 226752_at    | <i>FAM174A</i> | 0.79 | 0.0008696 | no  |
| 239223_s_at  | <i>FBXL20</i>  | 0.79 | 0.0004156 | yes |
| 225022_at    | <i>GOPC</i>    | 0.79 | 0.0005923 | yes |
| 204176_at    | <i>KLHL20</i>  | 0.79 | 0.0003973 | no  |
| 225452_at    | <i>MED1</i>    | 0.79 | 0.0005078 | yes |
| 230528_s_at  | <i>MGC2752</i> | 0.79 | 5.27E-05  | no  |
| 220925_at    | <i>NAA35</i>   | 0.79 | 0.0002797 | no  |
| 212629_s_at  | <i>PKN2</i>    | 0.79 | 0.0004352 | no  |
| 209296_at    | <i>PPM1B</i>   | 0.79 | 0.0009847 | no  |
| 231173_at    | <i>PYROXD1</i> | 0.79 | 0.0005597 | no  |
| 226298_at    | <i>RUNDC1</i>  | 0.79 | 0.0008398 | yes |
| 1554555_a_at | <i>SETD6</i>   | 0.79 | 0.0001971 | no  |
| 213034_at    | <i>SIK3</i>    | 0.79 | 9.10E-06  | yes |
| 229776_at    | <i>SLCO3A1</i> | 0.79 | 0.0001185 | yes |
| 228662_at    | <i>SOCS7</i>   | 0.79 | 0.0006709 | yes |
| 201449_at    | <i>TIA1</i>    | 0.79 | 0.0007791 | no  |
| 203690_at    | <i>TUBGCP3</i> | 0.79 | 0.000182  | no  |
| 218090_s_at  | <i>WDR11</i>   | 0.79 | 2.52E-05  | no  |
| 234991_at    | <i>ZXDC</i>    | 0.79 | 0.0003971 | yes |
| 227547_at    |                | 0.79 | 2.70E-05  |     |
| 232963_at    |                | 0.79 | 6.89E-05  |     |
| 220900_at    |                | 0.79 | 0.0003081 |     |
| 243997_x_at  |                | 0.79 | 0.0006967 |     |
| 238431_at    |                | 0.79 | 0.0007433 |     |

|              |           |      |           |     |
|--------------|-----------|------|-----------|-----|
| 226542_at    |           | 0.79 | 0.0009825 |     |
| 218434_s_at  | AACS      | 0.80 | 0.0009915 | no  |
| 203526_s_at  | APC       | 0.80 | 9.69E-05  | no  |
| 202631_s_at  | APPBP2    | 0.80 | 0.0008188 | yes |
| 201879_at    | ARIH1     | 0.80 | 0.0002033 | no  |
| 201658_at    | ARL1      | 0.80 | 1.98E-05  | no  |
| 203486_s_at  | ARMC8     | 0.80 | 0.000141  | no  |
| 232515_at    | ASB3      | 0.80 | 0.0006273 | no  |
| 227777_at    | C10orf18  | 0.80 | 0.0003238 | no  |
| 217814_at    | CCDC47    | 0.80 | 0.0001197 | no  |
| 212911_at    | DNAJC16   | 0.80 | 0.0008891 | yes |
| 243606_at    | FAM55C    | 0.80 | 0.0008953 | no  |
| 1555971_s_at | FBXO28    | 0.80 | 0.000216  | yes |
| 202272_s_at  | FBXO28    | 0.80 | 0.0003735 | yes |
| 230454_at    | ICA1L     | 0.80 | 0.0005581 | yes |
| 229429_x_at  | LOC728855 | 0.80 | 0.0005025 | no  |
| 225992_at    | MLLT10    | 0.80 | 9.73E-05  | yes |
| 203207_s_at  | MTFR1     | 0.80 | 0.0006053 | no  |
| 218667_at    | PJA1      | 0.80 | 0.0001621 | no  |
| 212628_at    | PKN2      | 0.80 | 0.0001619 | no  |
| 227254_at    | POU2F1    | 0.80 | 0.0003115 | no  |
| 203253_s_at  | PPIP5K2   | 0.80 | 0.0001916 | yes |
| 213878_at    | PYROXD1   | 0.80 | 0.0002706 | no  |
| 200928_s_at  | RAB14     | 0.80 | 0.0004482 | no  |
| 214855_s_at  | RALGAPA1  | 0.80 | 0.0007877 | no  |
| 224618_at    | ROD1      | 0.80 | 0.0002432 | yes |
| 238005_s_at  | SIN3A     | 0.80 | 0.0002709 | yes |
| 234268_at    | SLC2A13   | 0.80 | 1.56E-05  | no  |
| 210057_at    | SMG1      | 0.80 | 0.000428  | yes |
| 203310_at    | STXBP3    | 0.80 | 0.0005135 | no  |
| 238045_at    | TMEM65    | 0.80 | 0.0002501 | no  |
| 225411_at    | TMEM87B   | 0.80 | 0.0006145 | no  |
| 208883_at    | UBR5      | 0.80 | 0.0009669 | no  |
| 235511_at    |           | 0.80 | 0.0001419 |     |
| 1559347_at   |           | 0.80 | 0.0001514 |     |
| 225543_at    |           | 0.80 | 0.0002055 |     |
| 240016_at    |           | 0.80 | 0.000289  |     |
| 1562957_at   |           | 0.80 | 0.0006838 |     |
| 217259_at    |           | 0.80 | 0.0007146 |     |
| 212502_at    | ADO       | 0.81 | 0.0002688 | yes |
| 201880_at    | ARIH1     | 0.81 | 0.0001679 | no  |



|              |                  |      |           |      |
|--------------|------------------|------|-----------|------|
| 225863_s_at  | <i>C19orf12</i>  | 0.81 | 0.0001051 | yes  |
| 217873_at    | <i>CAB39</i>     | 0.81 | 7.94E-05  | no   |
| 203533_s_at  | <i>CUL5</i>      | 0.81 | 0.000121  | no   |
| 203531_at    | <i>CUL5</i>      | 0.81 | 0.0001771 | no   |
| 226422_at    | <i>ERGIC2</i>    | 0.81 | 0.0004973 | no   |
| 218518_at    | <i>FAM13B</i>    | 0.81 | 0.0007944 | no   |
| 244396_at    | <i>G3BP1</i>     | 0.81 | 0.000389  | no   |
| 242361_at    | <i>IMMT</i>      | 0.81 | 2.05E-05  | no   |
| 212634_at    | <i>KIAA0776</i>  | 0.81 | 0.000576  | no   |
| 228446_at    | <i>KIAA2026</i>  | 0.81 | 0.0006976 | no   |
| 225268_at    | <i>KPNA4</i>     | 0.81 | 0.0002119 | yes  |
| 225267_at    | <i>KPNA4</i>     | 0.81 | 0.0003695 | yes  |
| 203208_s_at  | <i>MTFR1</i>     | 0.81 | 5.72E-05  | no   |
| 219362_at    | <i>NAA35</i>     | 0.81 | 0.0001966 | no   |
| 200813_s_at  | <i>PAFAH1B1</i>  | 0.81 | 0.0006455 | no   |
| 202239_at    | <i>PARP4</i>     | 0.81 | 0.0001985 | no   |
| 220355_s_at  | <i>PBRM1</i>     | 0.81 | 0.0003826 | no   |
| 209438_at    | <i>PHKA2</i>     | 0.81 | 0.0003692 | no   |
| 227176_at    | <i>SLC2A13</i>   | 0.81 | 0.0008994 | no   |
| 228254_at    | <i>STAM2</i>     | 0.81 | 4.34E-05  | no   |
| 1554287_at   | <i>TRIM4</i>     | 0.81 | 0.000182  | yes  |
| 225089_at    | <i>USP40</i>     | 0.81 | 0.0002562 | yes  |
| 227541_at    | <i>WDR20</i>     | 0.81 | 0.000149  | no   |
| 237208_at    | <i>WDR61</i>     | 0.81 | 0.0005287 | no   |
| 235819_at    |                  | 0.81 | 6.33E-05  |      |
| 1560048_at   |                  | 0.81 | 0.000206  |      |
| 243065_at    |                  | 0.81 | 0.0004244 |      |
| 240277_at    |                  | 0.81 | 0.0004562 |      |
| 226993_at    |                  | 0.81 | 0.0006443 |      |
| 1564690_at   |                  | 0.81 | 0.0006942 |      |
| 1556580_a_at |                  | 0.81 | 0.0008325 |      |
| 1558624_at   |                  | 0.81 | 0.0008887 |      |
| 227815_at    |                  | 0.81 | 0.0009967 |      |
| 202629_at    | <i>APPBP2</i>    | 0.82 | 0.0006803 | yes  |
| 212819_at    | <i>ASB1</i>      | 0.82 | 0.0007887 | yes  |
| 211464_x_at  | <i>CASP6</i>     | 0.82 | 0.0009132 | no   |
| 223301_s_at  | <i>CCDC82</i>    | 0.82 | 0.0006498 | no   |
| 208896_at    | <i>DDX18</i>     | 0.82 | 0.0005921 | no   |
| 230974_at    | <i>DDX19B</i>    | 0.82 | 0.0006995 | no   |
| 220547_s_at  | <i>FAM35A</i>    | 0.82 | 0.0001427 | no   |
| 1557113_at   | <i>LOC283588</i> | 0.82 | 6.24E-05  | n.a. |

|              |                  |      |           |      |
|--------------|------------------|------|-----------|------|
| 235884_at    | <i>LOC644794</i> | 0.82 | 9.42E-05  | n.a. |
| 225055_at    | <i>LOC651250</i> | 0.82 | 0.000945  | n.a. |
| 1557965_at   | <i>MTERFD2</i>   | 0.82 | 0.0003913 | no   |
| 212585_at    | <i>OSBPL8</i>    | 0.82 | 0.0006901 | no   |
| 215596_s_at  | <i>RNF160</i>    | 0.82 | 0.0008331 | no   |
| 222789_at    | <i>RSBN1</i>     | 0.82 | 0.0002172 | yes  |
| 224844_at    | <i>SLAIN2</i>    | 0.82 | 9.05E-05  | no   |
| 235241_at    | <i>SLC38A9</i>   | 0.82 | 0.000563  | no   |
| 202277_at    | <i>SPTLC1</i>    | 0.82 | 1.73E-05  | no   |
| 220486_x_at  | <i>TMEM164</i>   | 0.82 | 0.0006555 | yes  |
| 224704_at    | <i>TNRC6A</i>    | 0.82 | 0.0009564 | yes  |
| 238494_at    | <i>TRAF3IP1</i>  | 0.82 | 0.0007156 | no   |
| 225945_at    | <i>ZNF655</i>    | 0.82 | 0.0007733 | no   |
| 1556762_a_at |                  | 0.82 | 7.42E-05  |      |
| 1561763_at   |                  | 0.82 | 0.0002251 |      |
| 241997_at    |                  | 0.82 | 0.0003381 |      |
| 243253_at    |                  | 0.82 | 0.0008688 |      |
| 240020_at    |                  | 0.82 | 0.0009719 |      |
| 202916_s_at  | <i>FAM20B</i>    | 0.83 | 0.0002095 | no   |
| 204703_at    | <i>IFT88</i>     | 0.83 | 0.0002207 | no   |
| 226367_at    | <i>KDM5A</i>     | 0.83 | 0.0005376 | yes  |
| 226919_at    | <i>LYRM2</i>     | 0.83 | 0.0003668 | no   |
| 242838_at    | <i>MAP6D1</i>    | 0.83 | 0.0002232 | no   |
| 203497_at    | <i>MED1</i>      | 0.83 | 0.000444  | yes  |
| 223115_at    | <i>MED17</i>     | 0.83 | 0.0003178 | no   |
| 235552_at    | <i>METTL14</i>   | 0.83 | 0.0003597 | no   |
| 212594_at    | <i>PDCD4</i>     | 0.83 | 0.0002949 | no   |
| 201603_at    | <i>PPP1R12A</i>  | 0.83 | 0.0004046 | no   |
| 224617_at    | <i>ROD1</i>      | 0.83 | 0.0003319 | yes  |
| 203704_s_at  | <i>RREB1</i>     | 0.83 | 0.0003729 | yes  |
| 226217_at    | <i>SLC30A7</i>   | 0.83 | 0.0007446 | no   |
| 214965_at    | <i>SPATA2L</i>   | 0.83 | 0.0004362 | yes  |
| 216941_s_at  | <i>TAF1B</i>     | 0.83 | 0.0009691 | yes  |
| 203732_at    | <i>TRIP4</i>     | 0.83 | 0.0001709 | no   |
| 233245_at    | <i>UHRF1BP1</i>  | 0.83 | 0.0007008 | yes  |
| 213120_at    | <i>UHRF1BP1L</i> | 0.83 | 0.0001656 | no   |
| 224639_at    | <i>UNQ1887</i>   | 0.83 | 0.0003873 | no   |
| 202745_at    | <i>USP8</i>      | 0.83 | 0.0006862 | no   |
| 212267_at    | <i>WAPAL</i>     | 0.83 | 0.0004935 | no   |
| 212343_at    | <i>YIPF6</i>     | 0.83 | 0.00023   | no   |
| 202778_s_at  | <i>ZMYM2</i>     | 0.83 | 0.0006963 | no   |

|             |            |      |           |      |
|-------------|------------|------|-----------|------|
| 228145_s_at | ZNF398     | 0.83 | 0.0006652 | no   |
| 235448_at   | ZXDC       | 0.83 | 8.30E-05  | yes  |
| 1560171_at  |            | 0.83 | 0.0002508 |      |
| 225137_at   |            | 0.83 | 0.0002751 |      |
| 241184_x_at |            | 0.83 | 0.0007175 |      |
| 241152_at   |            | 0.83 | 0.0007638 |      |
| 213282_at   | APOOL      | 0.84 | 0.0002948 | no   |
| 219116_s_at | DCUN1D2    | 0.84 | 0.0007572 | no   |
| 201788_at   | DDX42      | 0.84 | 0.0003808 | yes  |
| 212375_at   | EP400      | 0.84 | 0.0002203 | yes  |
| 218297_at   | FAM188A    | 0.84 | 0.0007626 | no   |
| 224743_at   | IMPAD1     | 0.84 | 0.0007519 | yes  |
| 204177_s_at | KLHL20     | 0.84 | 8.15E-05  | no   |
| 222506_at   | LMBR1      | 0.84 | 0.0008285 | no   |
| 223400_s_at | PBRM1      | 0.84 | 0.0007319 | no   |
| 201493_s_at | PUM2       | 0.84 | 0.0003849 | no   |
| 222445_at   | SLC39A9    | 0.84 | 0.0002653 | no   |
| 209523_at   | TAF2       | 0.84 | 0.0005199 | no   |
| 211987_at   | TOP2B      | 0.84 | 0.0008433 | no   |
| 213031_s_at | WDR73      | 0.84 | 0.0004511 | yes  |
| 212637_s_at | WWP1       | 0.84 | 0.0005709 | no   |
| 1552633_at  | ZNF101     | 0.84 | 6.42E-05  | no   |
| 226202_at   | ZNF398     | 0.84 | 0.0009908 | no   |
| 217922_at   |            | 0.84 | 0.0004547 |      |
| 221079_s_at |            | 0.84 | 0.0008952 |      |
| 226893_at   | ABL2       | 0.85 | 0.0007914 | yes  |
| 212547_at   | BRD3       | 0.85 | 0.0005158 | no   |
| 219560_at   | C22orf29   | 0.85 | 0.000416  | yes  |
| 231995_at   | C9orf82    | 0.85 | 0.0007887 | no   |
| 225747_at   | COQ10A     | 0.85 | 0.0006502 | yes  |
| 223958_s_at | DNAL1      | 0.85 | 0.0004634 | no   |
| 201056_at   | GOLGB1     | 0.85 | 0.0004708 | no   |
| 209254_at   | KLHDC10    | 0.85 | 0.0005505 | no   |
| 1557066_at  | LUC7L      | 0.85 | 0.0003932 | no   |
| 213224_s_at | NCRNA00081 | 0.85 | 0.0001204 | n.a. |
| 209221_s_at | OSBPL2     | 0.85 | 0.0008461 | no   |
| 225073_at   | PPHLN1     | 0.85 | 0.0001644 | no   |
| 226527_at   | RPRD2      | 0.85 | 0.0007514 | yes  |
| 204587_at   | SLC25A14   | 0.85 | 0.0009359 | no   |
| 217758_s_at | TM9SF3     | 0.85 | 0.0001844 | yes  |
| 234734_s_at | TNRC6A     | 0.85 | 0.0009006 | yes  |

|             |               |      |           |     |
|-------------|---------------|------|-----------|-----|
| 219163_at   | <i>ZNF562</i> | 0.85 | 0.0008627 | yes |
| 1563068_at  |               | 0.85 | 0.0004834 |     |
| 241887_at   |               | 0.85 | 0.0005134 |     |
| 237332_at   |               | 0.85 | 0.0005919 |     |
| 212755_at   | <i>MON2</i>   | 0.86 | 0.0008951 | no  |
| 226626_at   | <i>THOC2</i>  | 0.86 | 0.0009281 | no  |
| 208773_s_at |               | 0.86 | 0.000152  |     |
| 236458_at   |               | 0.86 | 0.000897  |     |
| 236204_at   |               | 0.86 | 0.0009051 |     |
| 238552_at   |               | 0.87 | 0.0007762 |     |

# The gene is not listed in the microrna.org database

**Supplemental Table 6. Pathway analysis of the *miR-3151*-associated gene expression signature.** Listed are the top ranking components of the categories biological functions and molecular/cellular functions.

| <b>Biological Functions</b>                           | <b><i>P</i>-value</b> |
|-------------------------------------------------------|-----------------------|
| Gene Expression (Transcriptional Regulation)          | 3.56E-07-1.95E-02     |
| Cellular Development                                  | 8.86E-07-2.57E-02     |
| Connective Tissue Development and Function            | 8.86E-07-1.95E-02     |
| Cancer                                                | 1.16E-06-2.61E-02     |
| Cell Cycle                                            | 2.16E-05-2.57E-02     |
| Cellular Function and Maintenance                     | 2.91E-05-2.41E-02     |
| Skeletal and Muscular System Development and Function | 2.91E-05-2.2E-02      |
| Reproductive System Development and Function          | 7.17E-05-1.95E-02     |
| Amino Acid Metabolism                                 | 1.06E-04-1.95E-02     |
| Post-Translational Modification                       | 1.06E-04-1.99E-02     |
| <b>Molecular and Cellular Functions</b>               | <b><i>P</i>-value</b> |
| Gene Expression (Transcriptional Regulation)          | 3.56E-07 - 1.95E-02   |
| Cellular Development                                  | 8.86E-07 - 2.57E-02   |
| Cell Cycle                                            | 2.16E-05 - 2.57E-02   |
| Cellular Function and Maintenance                     | 2.91E-05 - 2.41E-02   |
| Amino Acid Metabolism                                 | 1.06E-04 - 1.95E-02   |

**The following Alliance institutions, principal investigators, and cytogeneticists participated in this study:**

Wake Forest University School of Medicine, Winston-Salem, NC: David D. Hurd, P. Nagesh Rao, Wendy L. Flejter and Mark J. Pettenati (grant no. CA03927); The Ohio State University Medical Center, Columbus, OH: Clara D. Bloomfield, Karl S. Theil, Diane Minka and Nyla A. Heerema (grant no. CA77658); University of Iowa Hospitals, Iowa City, IA: Daniel A. Vaena and Shivanand R. Patil (grant no. CA47642); Duke University Medical Center, Durham, NC: Jeffrey Crawford, Sandra H. Bigner, Mazin B. Qumsiyeh, John Eyre and Barbara K. Goodman (grant no. CA47577); North Shore–Long Island Jewish Health System, Manhasset, NY: Daniel R. Budman and Prasad R. K. Koduru (grant no. CA35279); Roswell Park Cancer Institute, Buffalo, NY: Ellis G. Levine and AnneMarie W. Block (grant no. CA02599); Ft. Wayne Medical Oncology/Hematology, Ft. Wayne, IN: Sreenivasa Nattam and Patricia I. Bader; Minneapolis VA Medical Center, Minneapolis, MN: Vicki A. Morrison and Sugandhi A. Tharapel (grant no. CA47555); University of Chicago Medical Center, Chicago, IL: Hedy L. Kindler, Diane Roulston, Yanming Zhang and Michelle M. Le Beau (grant no. CA41287); Dana Farber Cancer Institute, Boston, MA: Harold J. Burstein, Leonard L. Atkins, Paola Dal Cin and Cynthia C. Morton (grant no. CA32291); Dartmouth Medical School, Lebanon, NH: Konstantin Dragnev, Doris H. Wurster-Hill and Thuluvancheri K. Mohandas (grant no. CA04326); Eastern Maine Medical Center, Bangor, ME: Thomas H. Openshaw and Laurent J. Beauregard (grant no. CA35406); Vermont Cancer Center, Burlington, VT: Steven M. Grunberg, Elizabeth F. Allen and Mary Tang (grant no. CA77406); University of Minnesota, Minneapolis, MN: Bruce A. Peterson, Diane C.

Arthur and Betsy A. Hirsch (grant no. CA16450); Mount Sinai School of Medicine, New York, NY: Lewis R. Silverman and Vesna Najfeld (grant no. CA04457); Rhode Island Hospital, Providence, RI: William Sikov, Teresita Padre-Mendoza, Hon Fong L. Mark and Shelly L. Kerman (grant no. CA08025); SUNY Upstate Medical University, Syracuse, NY: Stephen L. Graziano, Larry Gordon and Constance K. Stein (grant no. CA21060); University of California at San Diego: Barbara A. Parker, Renée Bernstein and Marie L. Dell'Aquila (grant no. CA11789); University of Maryland Cancer Center, Baltimore, MD: Martin Edelman, Judith Stamberg and Yi Ning (grant no. CA31983); Washington University School of Medicine, St. Louis, MO: Nancy L. Bartlett, Michael S. Watson, Eric C. Crawford and Jaime Garcia-Heras (grant no. CA77440); University of Massachusetts Medical Center, Worcester, MA: William W. Walsh and Vikram Jaswaney (grant no. CA37135); Long Island Jewish Medical Center CCOP, Lake Success, NY: Kanti R. Rai and Prasad R. K. Koduru (grant no. CA11028); Massachusetts General Hospital, Boston, MA: Jeffrey W. Clark, Leonard L. Atkins, Paola Dal Cin and Cynthia C. Morton (grant no. CA12449); University of Missouri/Ellis Fischel Cancer Center, Columbia, MO: Carl E. Freter and Tim H. Huang (grant no. CA12046); University of North Carolina, Chapel Hill, NC: Thomas C. Shea and Kathleen W. Rao (grant no. CA47559); Weill Medical College of Cornell University, New York, NY: John Leonard and Ram S. Verma (grant no. CA07968); University of Illinois at Chicago: David J. Peace, Kathleen E. Richkind and Maureen M. McCorquodale (grant no. CA74811); University of Nebraska Medical Center, Omaha, NE: Apar Ganti and Warren G. Sanger (grant no. CA77298); Western Pennsylvania Hospital, Pittsburgh, PA: John Lister and Gerard R. Diggans; University of Cincinnati Medical Center,

Cincinnati, OH: Orlando J. Martelo and Ashok K. Srivastava; McGill Department of Oncology, Montreal, Quebec: J. L. Hutchison and Jacqueline Emond (grant no. CA31809); Medical University of South Carolina, Charleston, SC: Mark R. Green and Daynna J. Wolff (grant no. CA03927); University of Puerto Rico School of Medicine, San Juan, PR: Eileen I. Pacheco, Leonard L. Atkins and Cynthia C. Morton; Christiana Care Health Services Inc, Newark, DE: Stephen S. Grubbs and Digamber S. Borgaonkar (grant no. CA45418); Walter Reed National Military Medical Center, Washington, DC: Jeremy G. Perkins and Rawatmal B. Surana (grant no. CA26806).



## Supplemental References

- 1) Mayer RJ, Davis RB, Schiffer CA, et al. Intensive postremission chemotherapy in adults with acute myeloid leukemia. *N Engl J Med.* 1994;331(14):896-903.
- 2) Stone RM, Berg DT, George SL, et al. Granulocyte-macrophage colony-stimulating factor after initial chemotherapy for elderly patients with primary acute myelogenous leukemia. *N Engl J Med.* 1995;332(25):1671-1677.
- 3) Lee EJ, George SL, Caligiuri M, et al. Parallel phase I studies of daunorubicin given with cytarabine and etoposide with or without the multidrug resistance modulator PSC-833 in previously untreated patients 60 years of age or older with acute myeloid leukemia: results of Cancer and Leukemia Group B study 9420. *J Clin Oncol.* 1999;17(9):2831-2839.
- 4) Baer MR, George SL, Dodge RK, et al. Phase 3 study of the multidrug resistance modulator PSC-833 in previously untreated patients 60 years of age and older with acute myeloid leukemia: Cancer and Leukemia Group B study 9720. *Blood.* 2002;100(4):1224-1232.
- 5) Baer MR, George SL, Caligiuri MA, et al. Low-dose interleukin-2 immunotherapy does not improve outcome of patients age 60 years and older with acute myeloid leukemia in first complete remission: Cancer and Leukemia Group B study 9720. *J Clin Oncol.* 2008;26(30):4934-4939.
- 6) Marcucci G, Moser B, Blum W, et al. A phase III randomized trial of intensive induction and consolidation chemotherapy  $\pm$  oblimersen, a pro-apoptotic Bcl-2

antisense oligonucleotide in untreated acute myeloid leukemia patients >60 years old [abstract]. *J Clin Oncol.* 2007;25(suppl):360s. Abstract 7012.

- 7) Baldus CD, Tanner SM, Ruppert AS, et al. *BAALC* expression predicts clinical outcome of de novo acute myeloid leukemia patients with normal cytogenetics: a Cancer and Leukemia Group B study. *Blood.* 2003;102(5):1613-1618.
- 8) Langer C, Radmacher MD, Ruppert AS, et al. High *BAALC* expression associates with other molecular prognostic markers, poor outcome, and a distinct gene-expression signature in cytogenetically normal patients younger than 60 years with acute myeloid leukemia: a Cancer and Leukemia Group B (CALGB) study. *Blood.* 2008;111(11):5371-5379.
- 9) Marcucci G, Baldus CD, Ruppert AS, et al. Overexpression of the ETS-related gene, *ERG*, predicts a worse outcome in acute myeloid leukemia with normal karyotype: a Cancer and Leukemia Group B study. *J Clin Oncol.* 2005;23(36):9234-9242.
- 10) Marcucci G, Maharry K, Whitman SP, et al. High expression levels of the *ETS*-related gene, *ERG*, predict adverse outcome and improve molecular risk-based classification of cytogenetically normal acute myeloid leukemia: a Cancer and Leukemia Group B study. *J Clin Oncol.* 2007;25(22):3337-3343.
- 11) Becker H, Marcucci G, Maharry K, et al. Favorable prognostic impact of *NPM1* mutations in older patients with cytogenetically normal de novo acute myeloid leukemia and associated gene- and microRNA-expression signatures: a Cancer and Leukemia Group B study. *J Clin Oncol.* 2010;28(4):596-604.

- 12) Irizarry RA, Bolstad BM, Collin F, Cope LM, Hobbs B, Speed TP. Summaries of Affymetrix GeneChip probe level data. *Nucleic Acids Res.* 2003;31(4):e15.
- 13) Klein JP, Moeschberger MP. *Survival Analysis: Techniques for Censored and Truncated Data* (2<sup>nd</sup> ed.). New York, NY: Springer-Verlag; 2003.
- 14) Schwind S, Marcucci G, Maharry K, et al. *BAALC* and *ERG* expression levels are associated with outcome and distinct gene and microRNA expression profiles in older patients with de novo cytogenetically normal acute myeloid leukemia: a Cancer and Leukemia Group B study. *Blood.* 2010;116(25):5660-5669.
